# Supplementary material for: The paradoxes hidden behind the Droop model highlighted by a metabolic approach
Source: Front Plant Sci. 2022 Aug 22;13:941230. doi: 10.3389/fpls.2022.941230 (PMC9442053; doi:10.3389/fpls.2022.941230)
Supplement: Supplementary file 4 [file Table_1.XLSX]

## Sheet: Sheet1
Fluxes (in mol. h-1. Mol B-1 ) at t=0.75 d
	Model	w/oEX*		Ex_CARB		Ex_G6P		Ex_PEP		Ex_GAP
Reaction Names	Reactions	Flux	SD	Flux	SD	Flux	SD	Flux	SD	Flux	SD
R1	10 Light + 3 ADP + 3 Pi + H + 2 cNADP --> O2 + H2O + 2 cNADPH + 3 ATP	4.39635	0.0343371	6.41984	0.0706706	8.45851	0.156513	17.9671	0.719882	16.5517	0.766197
R2	CO2 + H2O + cRu15DP --> 2 cG3P	4.39635	0.0343371	6.41984	0.0706706	8.45851	0.156513	17.9671	0.719882	16.5517	0.766197
R3	ATP + cG3P --> ADP + H + c13DPG	8.7927	0.0686742	12.8397	0.141341	16.917	0.313027	35.9342	1.43976	33.1034	1.53239
R4	H + cNADPH + c13DPG <--> cNADP + Pi + cGAP	8.7927	0.0686742	12.8397	0.141341	16.917	0.313027	35.9342	1.43976	33.1034	1.53239
R5	cGAP <--> cDHAP	1.46545	0.0114457	2.13995	0.0235569	2.8195	0.0521711	5.98903	0.239961	5.51723	0.255399
R6	cDHAP + cGAP <--> cF16P	1.46545	0.0114457	2.13995	0.0235569	2.8195	0.0521711	5.98903	0.239961	5.51723	0.255399
R7	H2O + cF16P <--> Pi + cF6P	1.46545	0.0114457	2.13995	0.0235569	2.8195	0.0521711	5.98903	0.239961	5.51723	0.255399
R8	cF6P + cGAP <--> cE4P + cX5P	1.46545	0.0114457	2.13995	0.0235569	2.8195	0.0521711	5.98903	0.239961	5.51723	0.255399
R9	H2O + cE4P + cGAP <--> Pi + cS7P	1.46545	0.0114457	2.13995	0.0235569	2.8195	0.0521711	5.98903	0.239961	5.51723	0.255399
R10	cGAP + cS7P <--> cR5P + cX5P	1.46545	0.0114457	2.13995	0.0235569	2.8195	0.0521711	5.98903	0.239961	5.51723	0.255399
R11	cX5P <--> cRu5P	2.9309	0.0228914	4.2799	0.0471137	5.63901	0.104342	11.9781	0.479921	11.0345	0.510798
R12	cR5P <--> cRu5P	1.46545	0.0114457	2.13995	0.0235569	2.8195	0.0521711	5.98903	0.239961	5.51723	0.255399
R13	ATP + cRu5P --> ADP + H + cRu15DP	4.39635	0.0343371	6.41984	0.0706706	8.45851	0.156513	17.9671	0.719882	16.5517	0.766197
R14	cGAP <--> GAP	1.46545	0.0114457	2.13995	0.0235569	2.8195	0.0521711	5.98903	0.239961	5.51723	0.255399
R15	G6P <--> G1P	0.0194138	0.0225992	0.159393	0.087714	0.251876	0.995521	0.228807	312.023	0.185917	12.2638
R16	F6P <--> G6P	0.533792	0.414976	0.74993	0.331829	1.079	0.413861	0.908197	0.383725	0.833357	0.342908
R17	ATP + F6P --> ADP + F16P + H	0	0.00128825	0.00107939	0.0165271	0	0.0150218	0.0790535	0.063627	0.0914371	0.069972
R18	F16P + H2O --> F6P + Pi	0.200123	0.360894	0.369071	0.276537	0.669987	0.288164	0.550629	0.188721	0.509682	0.0594366
R19	DHAP + GAP <--> F16P	0.200123	0.360896	0.367991	0.27703	0.669987	0.288556	0.471576	0.199158	0.418245	0.0918084
R20	DHAP <--> GAP	0.231811	0.366856	-0.404751	0.278153	0.710592	0.288879	0.516527	0.199914	0.461191	0.0934053
R21	GAP + NAD + Pi <--> 13DPG + H + NADH	1.19358	130.733	1.53875	956.087	1.5942	73.4541	5.21087	1.81069	1.65356	11.7027
R22	13DPG + ADP <--> 3PG + ATP	1.19358	130.733	1.53875	956.087	1.5942	73.4541	5.21087	1.81069	1.65356	11.7027
R23	3PG <--> 2PG	1.033	130.733	1.35494	956.087	1.39737	73.454	5.00075	1.8038	1.45379	11.7016
R24	2PG <--> H2O + PEP	1.033	130.733	1.35494	956.087	1.39737	73.454	5.00075	1.8038	1.45379	11.7016
R25	ADP + H + PEP <--> ATP + PYR	1.00184	1.13239	1.15486	0.489721	1.2573	0.479683	1.36886	0.549169	1.30489	0.550622
R26	CoA + NAD + PYR --> AcCoA + CO2 + NADH	0.997756	1.13175	1.15019	0.488538	1.25229	0.476488	1.36352	0.545759	1.29982	0.547172
R27	AcCoA + H2O + OXA <--> CIT + CoA + H	0.459256	0.281936	0.525693	0.251411	0.562955	0.408339	0.600957	0.451446	0.571352	0.454742
R28	CIT + NAD <--> AKG + CO2 + NADH	0.459256	0.281936	0.525693	0.251411	0.562955	0.408339	0.600957	0.451446	0.571352	0.454742
R29	AKG + CoA + NAD --> CO2 + NADH + SUCCoA	0.425388	0.261144	0.486926	0.23287	0.521439	0.378226	0.556639	0.418154	0.529217	0.421207
R30	ADP + Pi + SUCCoA <--> ATP + CoA + SUC	0.425388	0.261144	0.486926	0.23287	0.521439	0.378226	0.556639	0.418154	0.529217	0.421207
R31	FAD + SUC <--> FADH2 + FUM	0.42659	0.261882	0.488302	0.233528	0.522913	0.379294	0.558212	0.419336	0.530713	0.422397
R32	FUM + H2O <--> MAL	0.440131	0.270195	0.503802	0.240941	0.539511	0.391334	0.575931	0.432646	0.547559	0.435805
R33	FAD + MAL <--> FADH2 + OXA	0.440131	0.270195	0.503802	0.240941	0.539511	0.391334	0.575931	0.432646	0.547559	0.435805
R34	ATP + CO2 + H2O + PYR --> ADP + OXA + Pi + 2 H	0.0721345	0.0442832	0.0825697	0.0394886	0.0884222	0.064137	0.0943911	0.0709078	0.0897412	0.0714255
R35	ATP + OXA --> ADP + CO2 + PEP	0	0	0	0	0	0	0	0	0	0
R36	CO2 + H2O + PEP <--> H + OXA + Pi	0	0	0	0	0	0	0	0	0	0
R37	G6P + H2O + NADP <--> 6PG + NADPH + 2 H	0.514275	0.315712	0.588671	0.28153	0.630396	0.457258	0.672951	0.505529	0.6398	0.50922
R38	6PG + NADP <--> CO2 + NADPH + RU5P	0.514275	0.315712	0.588671	0.28153	0.630396	0.457258	0.672951	0.505529	0.6398	0.50922
R39	RU5P <--> R5P	0.180605	0.110873	0.206732	0.0988687	0.221385	0.160582	0.23633	0.177534	0.224688	0.17883
R40	RU5P <--> X5P	0.33367	0.204839	0.381939	0.182661	0.409011	0.296676	0.436621	0.327995	0.415112	0.33039
R41	R5P + X5P <--> GAP + S7P	0.171636	0.105367	0.196465	0.0939586	0.210391	0.152607	0.224593	0.168717	0.213529	0.169949
R42	GAP + S7P <--> E4P + F6P	0.171636	0.105367	0.196465	0.0939586	0.210391	0.152607	0.224593	0.168717	0.213529	0.169949
R43	F6P + GAP <--> E4P + X5P	0.162034	0.099472	-0.185474	0.0887021	0.19862	0.144069	0.212028	0.159278	0.201583	0.160441
R44	GLYC3P + NAD <--> DHAP + H + NADH	0.0316888	0.0658566	-0.0367601	0.0249705	0.0406045	0.0136535	0.0449516	0.0173656	0.0429462	0.0171978
R45	H + NADH + NO3 <--> H2O + NAD + NO2	0.207181	0.127188	0.237152	0.113417	0.253962	0.184211	0.271105	0.203658	0.25775	0.205145
R46	5 H + 3 NADPH + NO2 <--> NH4 + 2 H2O + 3 NADP	0.207181	0.127188	0.237152	0.113417	0.253962	0.184211	0.271105	0.203658	0.25775	0.205145
R47	ATP + SO4 --> APS + PPi	0.00480897	0.00295221	0.00550464	0.00263257	0.00589481	0.0042758	0.00629274	0.00472719	0.00598275	0.0047617
R48	APS + NADH --> AMP + NAD + SO3	0.00480897	0.00295221	0.00550464	0.00263257	0.00589481	0.0042758	0.00629274	0.00472719	0.00598275	0.0047617
R49	5 H + 3 NADPH + SO3 <--> H2S + 3 H2O + 3 NADP	0.00480897	0.00295221	0.00550464	0.00263257	0.00589481	0.0042758	0.00629274	0.00472719	0.00598275	0.0047617
R50	1.5 ADP + 1.5 H + 1.5 Pi + FADH2 + 0.5 O2 --> FAD + 1.5 ATP + 2.5 H2O	0.866722	0.532078	0.992103	0.474469	1.06242	0.770629	1.13414	0.851982	1.07827	0.858202
R51	3.5 H + 2.5 ADP + 2.5 Pi + NADH + 0.5 O2 --> NAD + 2.5 ATP + 3.5 H2O	1.454	0.892607	1.66434	0.795964	1.78231	1.2928	1.90262	1.42927	1.8089	1.43971
R52	H2O + PPi --> H + 2 Pi	0.0385034	0.0236371	0.0440734	0.0210779	0.0471973	0.0342345	0.0503833	0.0378486	0.0479013	0.0381249
R53	AMP + ATP --> 2 ADP	0.0314165	0.0192865	0.0359613	0.0171983	0.0385102	0.0279334	0.0411098	0.0308822	0.0390847	0.0311077
R54	ATP + H2O --> ADP + H + Pi + MAINT	0	0	0	0	0	0	0	0	0	0
R55	AKG + H + NADPH + NH4 --> GLU + H2O + NADP	0.347543	0.213355	0.397819	0.190255	0.426017	0.309011	0.454775	0.341633	0.432372	0.344127
R56	ATP + GLU + NH4 --> ADP + GLN + H + Pi	0	0	0	0	0	0	0	0	0	0
R57	AKG + GLN + H + NADPH <--> NADP + 2 GLU	0.0346436	0.0212676	-0.0396552	0.0189649	0.0424659	0.0308026	0.0453326	0.0340544	0.0430994	0.034303
R58	3PG + GLU + H2O + NAD <--> AKG + H + NADH + Pi + SER	0.160578	0.0985786	0.183808	0.0879054	0.196836	0.142775	0.210124	0.157848	0.199773	0.159
R59	SER --> NH4 + PYR	0.134398	0.0825065	0.15384	0.0735735	0.164745	0.119497	0.175866	0.132112	0.167202	0.133077
R60	AcCoA + H2S + SER <--> Ace + CYS + CoA + H	0.00480897	0.00295221	0.00550464	0.00263257	0.00589481	0.0042758	0.00629274	0.00472719	0.00598275	0.0047617
R61	ATP + Ace + CoA --> ADP + AcCoA + Pi	0.0080044	0.00491388	0.00916233	0.00438185	0.00981176	0.00711696	0.0104741	0.00786828	0.00995813	0.00792572
R62	GLU + PYR --> AKG + ALA	0.0229691	0.0141007	0.0262919	0.012574	0.0281555	0.0204226	0.0300561	0.0225785	0.0285755	0.0227434
R63	H + THR <--> 2-oxobutan + NH4	0.00493552	0.0030299	0.0056495	0.00270185	0.00604994	0.00438832	0.00645834	0.00485159	0.00614019	0.00488701
R64	2-oxobutan + GLU + H + NADPH + PYR <--> AKG + CO2 + H2O + ILE + NADP	0.00493552	0.0030299	0.0056495	0.00270185	0.00604994	0.00438832	0.00645834	0.00485159	0.00614019	0.00488701
R65	2 H + ALA + NADPH + PYR <--> CO2 + H2O + NADP + VAL	0.00814677	0.00500128	0.0093253	0.00445979	0.00998628	0.00724354	0.0106604	0.00800823	0.0101352	0.00806669
R66	2 PYR + AcCoA + GLU + H + NAD + NADPH <--> AKG + CoA + LEU + NADH + NADP + 2 CO2	0.0120224	0.00738053	0.0137616	0.00658143	0.014737	0.0106895	0.0157319	0.011818	0.0149569	0.0119042
R67	2 PEP + ATP + E4P + NADPH --> ADP + CHO + NADP + 4 Pi	0.00961794	0.00590442	0.0110093	0.00526515	0.0117896	0.0085516	0.0125855	0.00945437	0.0119655	0.0095234
R68	CHO <--> PRE	0.00947556	0.00581702	0.0108463	0.00518721	0.0116151	0.00842502	0.0123992	0.00931442	0.0117884	0.00938243
R69	GLU + H + PRE <--> AKG + CO2 + H2O + PHE	0.00547336	0.00336008	0.00626515	0.00299628	0.00670923	0.00486654	0.00716213	0.00538029	0.00680931	0.00541957
R70	GLU + NAD + PRE <--> AKG + CO2 + NADH + TYR	0.0040022	0.00245694	0.00458117	0.00219092	0.00490588	0.00355848	0.00523705	0.00393414	0.00497906	0.00396286
R71	CHO + GLN <--> ANTH + GLU + H + PYR	0.000126552	7.76897e-05	0.000144859	6.92783e-05	0.000155127	0.000112521	0.000165598	0.0001244	0.000157441	0.000125308
R72	ANTH + H + PRPP + SER <--> CO2 + GAP + PPi + TRYP + 2 H2O	0.000126552	7.76897e-05	0.000144859	6.92783e-05	0.000155127	0.000112521	0.000165598	0.0001244	0.000157441	0.000125308
R73	3 H2O + 2 NAD + ATP + GLN + PRPP --> AICAR + AKG + HIS + Pi + 2 NADH + 2 PPi + 5 H	0.00226211	0.0013887	0.00258936	0.00123835	0.00277289	0.00201131	0.00296007	0.00222364	0.00281425	0.00223988
R74	GLU + OXA <--> AKG + ASP	0.0530252	0.032552	0.0606959	0.0290276	0.0649981	0.0471463	0.0693858	0.0521235	0.0659677	0.052504
R75	ASP + ATP + GLN + H2O --> ADP + ASN + GLU + H + Pi	0.00628013	0.00385535	0.00718863	0.00343793	0.00769816	0.00558386	0.00821782	0.00617333	0.007813	0.0062184
R76	2 ATP + 2 H2O + CO2 + GLN --> CaP + GLU + Pi + 2 ADP + 3 H	0.0102191	0.00627345	0.0116974	0.00559422	0.0125265	0.00908608	0.0133721	0.0100453	0.0127133	0.0101186
R77	2 GLU + ASP + ATP + CaP + NADH --> AKG + AMP + ARG + FUM + H2O + NAD + PPi + Pi	0.00694453	0.00426322	0.00794914	0.00380164	0.00851258	0.00617459	0.00908722	0.00682643	0.00863956	0.00687627
R78	3 H + 2 NADH + GLU <--> PRO + 2 H2O + 2 NAD	0.00868462	0.00533146	0.00994095	0.00475422	0.0106456	0.00772176	0.0113642	0.00853693	0.0108044	0.00859925
R79	AKG + O2 + PRO <--> CO2 + HydPro + SUC	0.00120224	0.000738053	0.00137616	0.000658143	0.0014737	0.00106895	0.00157319	0.0011818	0.00149569	0.00119042
R80	ASP + ATP + H + NADPH --> ADP + ASA + NADP + Pi	0.0236335	0.0145086	0.0270524	0.0129377	0.0289699	0.0210133	0.0309255	0.0232316	0.0294021	0.0234012
R81	2 H + ASA + GLU + NADH + PYR <--> AKG + DAP + H2O + NAD	0.0080044	0.00491388	0.00916233	0.00438185	0.00981176	0.00711696	0.0104741	0.00786828	0.00995813	0.00792572
R82	DAP <--> CO2 + H + LYS	0.0080044	0.00491388	0.00916233	0.00438185	0.00981176	0.00711696	0.0104741	0.00786828	0.00995813	0.00792572
R83	ASA + H + NADPH <--> HSER + NADP	0.0156291	0.00959468	0.0178901	0.00855586	0.0191581	0.0138964	0.0204514	0.0153634	0.0194439	0.0154755
R84	ATP + H2O + HSER --> ADP + H + Pi + THR	0.0124179	0.00762331	0.0142143	0.00679793	0.0152218	0.0110411	0.0162493	0.0122067	0.0154489	0.0122958
R85	AcCoA + CYS + H2O + HSER <--> Ace + CoA + HCYS + H + NH4 + PYR	0.00321125	0.00197138	0.0036758	0.00175794	0.00393634	0.00285522	0.00420206	0.00315664	0.00399506	0.00317969
R86	HCYS + MTHF <--> H + MET + THF	0.00360673	0.00221416	0.00412848	0.00197443	0.00442111	0.00320685	0.00471956	0.00354539	0.00448706	0.00357127
R87	4.306 ATP + 3.306 H2O + 0.111 ALA + 0.092 GLY + 0.09 LEU + 0.061 VAL + 0.06 LYS + 0.056 PRO + 0.056 THR + 0.054 SER + 0.052 ARG + 0.052 GLN + 0.052 GLU + 0.047 ASN + 0.047 ASP + 0.041 PHE + 0.037 ILE + 0.03 TYR + 0.024 MET + 0.017 HIS + 0.012 CYS + 0.0090 HydPro + 0.0010 TRYP --> PROTEIN + 4.306 ADP + 4.306 Pi + 4.319 H	0.133528	0.0819724	0.152844	0.0730972	0.163678	0.118724	0.174727	0.131257	0.16612	0.132215
R88	GLY + H + PYR <--> ALA + glyoxylate	0	0	0	0	0	0	0	0	0	0
R89	SER + glyoxylate <--> GLY + HydPyr	0	0	0	0	0	0	0	0	0	0
R90	GLY + H2O + METHF <--> SER + THF	0.0140156	0.00860414	-0.0160431	0.00767257	0.0171803	0.0124617	0.01834	0.0137773	0.0174366	0.0138778
R91	GLY + NAD + THF <--> CO2 + METHF + NADH + NH4	0.00155026	0.000951699	-0.00177452	0.000848659	0.0019003	0.00137838	0.00202858	0.0015239	0.00192865	0.00153502
R92	H + HydPyr + NADH <--> Glycerate + NAD	0	0	0	0	0	0	0	0	0	0
R93	ATP + Glycerate --> ADP + 2 H + 3PG	0	0	0	0	0	0	0	0	0	0
R94	ATP + R5P --> AMP + H + PRPP	0.00896936	0.00550626	0.0102669	0.0049101	0.0109946	0.00797493	0.0117368	0.00881683	0.0111586	0.00888119
R95	5FTHF + H <--> H2O + MYLTHF	0	0	0	0	0	0	0	0	0	0
R96	H2O + MYLTHF <--> H + N10FTHF	0.00882699	0.00541886	0.0101039	0.00483216	0.0108201	0.00784835	0.0115505	0.00867688	0.0109815	0.00874022
R97	ATP + FORM + THF --> ADP + N10FTHF + Pi	0	0	0	0	0	0	0	0	0	0
R98	MYLTHF + NADPH <--> METHF + NADP	0.00882699	0.00541886	-0.0101039	0.00483216	0.0108201	0.00784835	0.0115505	0.00867688	0.0109815	0.00874022
R99	H + METHF + NADPH <--> MTHF + NADP	0.00360673	0.00221416	0.00412848	0.00197443	0.00442111	0.00320685	0.00471956	0.00354539	0.00448706	0.00357127
R100	5FTHF + ATP + H2O --> ADP + H + N10FTHF + Pi	0	0	0	0	0	0	0	0	0	0
R101	FORM + H + THF <--> H2O + N10FTHF	0	0	0	0	0	0	0	0	0	0
R102	DHF + H + NADPH <--> NADP + THF	4.74569e-05	2.91337e-05	5.43221e-05	2.59793e-05	5.81725e-05	4.21954e-05	6.20994e-05	4.66499e-05	5.90403e-05	4.69904e-05
R103	ACP + AcCoA + H <--> AcACP + CoA	0.0633775	0.131713	0.0735203	0.049941	0.081209	0.0273071	0.0899033	0.0347312	0.0858924	0.0343956
R104	ATP + AcCoA + CO2 + H2O <--> ADP + H + MalCoA + Pi	0.4631	0.962428	0.537212	0.364919	0.593394	0.199533	0.656923	0.253781	0.627616	0.251328
R105	ACP + MalCoA <--> CoA + MalACP	0.4631	0.962428	0.537212	0.364919	0.593394	0.199533	0.656923	0.253781	0.627616	0.251328
R106	12 H + 12 NADPH + 6 MalACP + AcACP <--> C14:0ACP + 6 ACP + 6 CO2 + 6 H2O + 12 NADP	0.0172387	0.035826	0.0199975	0.013584	0.0220888	0.00742752	0.0244537	0.00944687	0.0233627	0.00935559
R107	C14:0ACP + H + NADH + O2 <--> C14:1ACP + NAD + 2 H2O	0.000633775	0.00131713	0.000735203	0.00049941	0.00081209	0.000273071	0.000899033	0.000347312	0.000858924	0.000343956
R108	14 H + 14 NADPH + 7 MalACP + AcACP <--> C16:0ACP + 7 ACP + 7 CO2 + 7 H2O + 14 NADP	0.010584	0.0219961	0.0122779	0.00834015	0.0135619	0.00456028	0.0150138	0.0058001	0.014344	0.00574406
R109	C16:0ACP + H + NADH + O2 <--> C16:1ACP + NAD + 2 H2O	0.00354914	0.00737594	0.00411713	0.0027967	0.0045477	0.0015292	0.00503458	0.00194494	0.00480997	0.00192615
R110	C16:1ACP + H + NADH + O2 <--> C16:2ACP + NAD + 2 H2O	0.00050702	0.00105371	0.000588162	0.000399528	0.000649672	0.000218457	0.000719226	0.000277849	0.000687139	0.000275164
R111	C16:2ACP + H + NADH + O2 <--> C16:3ACP + NAD + 2 H2O	0.00050702	0.00105371	0.000588162	0.000399528	0.000649672	0.000218457	0.000719226	0.000277849	0.000687139	0.000275164
R112	16 H + 16 NADPH + 8 MalACP + AcACP <--> C18:0ACP + 8 ACP + 8 CO2 + 8 H2O + 16 NADP	0.034414	0.0715202	0.0399215	0.027118	0.0440965	0.0148277	0.0488175	0.018859	0.0466396	0.0186768
R113	C18:0ACP + H + NADH + O2 <--> C18:1ACP + NAD + 2 H2O	0.0340337	0.07073	0.0394804	0.0268183	0.0436092	0.0146639	0.0482781	0.0186506	0.0461242	0.0184704
R114	C18:1ACP + H + NADH + O2 <--> C18:2ACP + NAD + 2 H2O	0.0110911	0.0230498	0.012866	0.00873968	0.0142116	0.00477874	0.0157331	0.00607795	0.0150312	0.00601922
R115	C18:2ACP + H + NADH + O2 <--> C18:3ACP + NAD + 2 H2O	0.00773206	0.016069	0.00896947	0.00609281	0.0099075	0.00333146	0.0109682	0.0042372	0.0104789	0.00419626
R116	C18:3ACP + H + NADH + O2 <--> C18:4ACP + NAD + 2 H2O	0.0044998	0.00935163	0.00521994	0.00354581	0.00576584	0.0019388	0.00638313	0.00246591	0.00609836	0.00244208
R117	18 H + 18 NADPH + 9 MalACP + AcACP <--> C20:0ACP + 9 ACP + 9 CO2 + 9 H2O + 18 NADP	0.0011408	0.00237084	0.00132336	0.000898939	0.00146176	0.000491527	0.00161826	0.000625161	0.00154606	0.00061912
R118	C20:0ACP + H + NADH + O2 <--> C20:1ACP + NAD + 2 H2O	0.0011408	0.00237084	0.00132336	0.000898939	0.00146176	0.000491527	0.00161826	0.000625161	0.00154606	0.00061912
R119	C20:1ACP + H + NADH + O2 <--> C20:2ACP + NAD + 2 H2O	0.0011408	0.00237084	0.00132336	0.000898939	0.00146176	0.000491527	0.00161826	0.000625161	0.00154606	0.00061912
R120	C20:2ACP + H + NADH + O2 <--> C20:3ACP + NAD + 2 H2O	0.0011408	0.00237084	0.00132336	0.000898939	0.00146176	0.000491527	0.00161826	0.000625161	0.00154606	0.00061912
R121	C20:3ACP + H + NADH + O2 <--> C20:4ACP + NAD + 2 H2O	0.0011408	0.00237084	0.00132336	0.000898939	0.00146176	0.000491527	0.00161826	0.000625161	0.00154606	0.00061912
R122	C20:4ACP + H + NADH + O2 <--> C20:5ACP + NAD + 2 H2O	0.0011408	0.00237084	0.00132336	0.000898939	0.00146176	0.000491527	0.00161826	0.000625161	0.00154606	0.00061912
R123	GLYC3P + 0.524 C14:0ACP + 0.02 C14:1ACP + 0.222 C16:0ACP + 0.096 C16:1ACP + 0.016 C16:3ACP + 0.012 C18:0ACP + 0.724 C18:1ACP + 0.106 C18:2ACP + 0.102 C18:3ACP + 0.142 C18:4ACP + 0.036 C20:5ACP <--> PA + 2 ACP + 2 H	0.0316888	0.0658566	0.0367601	0.0249705	0.0406045	0.0136535	0.0449516	0.0173656	0.0429462	0.0171978
R124	4 ATP + 2 GLN + 2 H2O + ASP + CO2 + GLY + N10FTHF + PRPP --> AICAR + FUM + PPi + THF + 2 GLU + 4 ADP + 4 Pi + 7 H	0.00329035	0.00201993	0.00376633	0.00180123	0.00403329	0.00292555	0.00430556	0.00323439	0.00409346	0.003258
R125	ASP + CaP + H + O2 + PRPP <--> CO2 + H2O + H2O2 + PPi + Pi + UMP	0.00329035	0.00201993	0.00376633	0.00180123	0.00403329	0.00292555	0.00430556	0.00323439	0.00409346	0.003258
R126	2 H2O2 <--> O2 + 2 H2O	0.00164517	0.00100997	0.00188317	0.000900617	0.00201665	0.00146277	0.00215278	0.0016172	0.00204673	0.001629
R127	ATP + UMP --> ADP + UDP	0.00329035	0.00201993	0.00376633	0.00180123	0.00403329	0.00292555	0.00430556	0.00323439	0.00409346	0.003258
R128	ATP + UDP <--> ADP + UTP	0.00324289	0.0019908	0.00371201	0.00177526	0.00397512	0.00288335	0.00424346	0.00318774	0.00403442	0.00321101
R129	ATP + GLN + H2O + UTP --> ADP + CTP + GLU + Pi + 2 H	0.00223048	0.00136928	0.00255314	0.00122103	0.00273411	0.00198318	0.00291867	0.00219254	0.00277489	0.00220855
R130	ATP + CDP <--> ADP + CTP	6.32759e-05	3.88449e-05	-7.24295e-05	3.46391e-05	7.75633e-05	5.62605e-05	8.27992e-05	6.21998e-05	7.87204e-05	6.26539e-05
R131	AICAR + N10FTHF <--> H2O + IMP + THF	0.00555246	0.00340864	0.00635569	0.00303958	0.00680618	0.00493686	0.00726563	0.00545804	0.00690771	0.00549788
R132	ATP + H2O + IMP + NAD + NH4 --> AMP + GMP + NADH + PPi + 3 H	0.00223048	0.00136928	0.00255314	0.00122103	0.00273411	0.00198318	0.00291867	0.00219254	0.00277489	0.00220855
R133	ATP + GMP --> ADP + GDP	0.00223048	0.00136928	0.00255314	0.00122103	0.00273411	0.00198318	0.00291867	0.00219254	0.00277489	0.00220855
R134	ATP + GDP <--> ADP + GTP	0.00548918	0.00336979	0.00628326	0.00300494	0.00672862	0.0048806	0.00718283	0.00539584	0.00682899	0.00543523
R135	ASP + GTP + IMP <--> AMP + FUM + GDP + Pi + 2 H	0.00332198	0.00203936	0.00380255	0.00181855	0.00407208	0.00295368	0.00434696	0.00326549	0.00413282	0.00328933
R136	ATP + H + METHF + NADPH + UDP --> ADP + DHF + H2O + NADP + dTTP	4.74569e-05	2.91337e-05	5.43221e-05	2.59793e-05	5.81725e-05	4.21954e-05	6.20994e-05	4.66499e-05	5.90403e-05	4.69904e-05
R137	ATP + CDP + H + NADPH --> ADP + H2O + NADP + dCTP	6.32759e-05	3.88449e-05	7.24295e-05	3.46391e-05	7.75633e-05	5.62605e-05	8.27992e-05	6.21998e-05	7.87204e-05	6.26539e-05
R138	ATP + GDP + H + NADPH --> ADP + H2O + NADP + dGTP	6.32759e-05	3.88449e-05	7.24295e-05	3.46391e-05	7.75633e-05	5.62605e-05	8.27992e-05	6.21998e-05	7.87204e-05	6.26539e-05
R139	ATP + H + NADPH <--> H2O + NADP + dATP	4.74569e-05	2.91337e-05	5.43221e-05	2.59793e-05	5.81725e-05	4.21954e-05	6.20994e-05	4.66499e-05	5.90403e-05	4.69904e-05
R140	2.372 H2O + 1.372 ATP + 0.18 dATP + 0.18 dTTP + 0.32 dCTP + 0.32 dGTP --> DNA + PPi + 1.372 ADP + 1.372 Pi + 2.372 H	0.000221466	0.000135957	0.000253503	0.000121237	0.000271472	0.000196912	0.000289797	0.000217699	0.000275521	0.000219289
R141	1.4 H2O + 0.56 ATP + 0.34 GTP + 0.16 UTP + 0.34 CTP --> 0.4 ADP + 0.4 H + 0.4 Pi + PPi + RNA	0.00634341	0.0038942	0.00726106	0.00347257	0.00777573	0.00564012	0.00830062	0.00623553	0.00789172	0.00628106
R142	12 H + 8 ATP + 8 GLU + 8 NADPH + 2.5 O2 --> PPorphyrin + 4 NH4 + 6 CO2 + 8 AMP + 8 NADP + 8 PPi + 13 H2O	0.000395474	0.00024278	0.000452684	0.000216495	0.000484771	0.000351628	0.000517495	0.000388749	0.000492002	0.000391587
R143	18 H + 15 NADPH + 8 ATP + 4 GAP + 4 PYR --> Phytyl-PP + 4 ADP + 4 AMP + 4 CO2 + 7 PPi + 8 H2O + 15 NADP	0.000395474	0.00024278	0.000452684	0.000216495	0.000484771	0.000351628	0.000517495	0.000388749	0.000492002	0.000391587
R144	ATP + H2O + MET --> AdMET + H + PPi + Pi	0.000395474	0.00024278	0.000452684	0.000216495	0.000484771	0.000351628	0.000517495	0.000388749	0.000492002	0.000391587
R145	AdHCYS + H2O <--> Ad + HCYS	0.000395474	0.00024278	0.000452684	0.000216495	0.000484771	0.000351628	0.000517495	0.000388749	0.000492002	0.000391587
R146	ATP + Ad --> ADP + AMP + H	0.000395474	0.00024278	0.000452684	0.000216495	0.000484771	0.000351628	0.000517495	0.000388749	0.000492002	0.000391587
R147	4 NADPH + 2.5 O2 + 2 ATP + AdMET + Mg2 + PPorphyrin + Phytyl-PP --> AdHCYS + Chlorophyll + PPi + 2 ADP + 2 H2O + 2 Pi + 3 H + 4 NADP	0.000395474	0.00024278	0.000452684	0.000216495	0.000484771	0.000351628	0.000517495	0.000388749	0.000492002	0.000391587
R148	G1P <--> CARB + Pi	0.0194138	0.0225992	0.159393	0.087714	0.251876	0.995521	0.228807	312.023	0.185917	12.2638
R149	32.687 ATP + 32.687 H2O + 0.8456 PROTEIN + 0.0026 Chlorophyll + 0.0402 RNA + 0.0014 DNA + 0.1103 PA --> Biomass + 32.687 H + 32.687 ADP + 32.687 Pi	0.15819	0.0971122	0.181074	0.0865978	0.193908	0.140651	0.206998	0.1555	0.196801	0.156635
R150	# <--> CO2	2.0237	1.5757	3.69587	1.09477	5.52088	1.66446	14.8045	1.97354	13.5414	2.00259
R151	# <--> O2	3.16291	0.730038	-5.00693	0.644007	6.94278	1.04816	16.3456	1.35332	15.0096	1.38546
R152	# <--> H2O	1.01188	130.735	2.04866	956.087	3.57265	73.4595	6.09166	2.09681	8.72393	11.7508
R153	# <--> Pi	1.14719	130.738	1.66386	956.087	1.88202	73.464	8.6785	312.029	4.81598	16.9676
R154	# <--> SO4	0.00480897	0.00295221	0.00550464	0.00263257	0.00589481	0.0042758	0.00629274	0.00472719	0.00598275	0.0047617
R155	# <--> NO3	0.207181	0.127188	0.237152	0.113417	0.253962	0.184211	0.271105	0.203658	0.25775	0.205145
R156	# <--> Mg2	0.000395474	0.00024278	0.000452684	0.000216495	0.000484771	0.000351628	0.000517495	0.000388749	0.000492002	0.000391587
R157	# --> Light	43.9635	0.343371	64.1984	0.706706	84.5851	1.56513	179.671	7.19882	165.517	7.66197
R158	# <--> H	0.761847	130.753	0.715223	956.088	0.863275	73.4582	2.61133	2.02359	0.808828	11.7375
R159	Biomass --> #	0.15819	0.0971122	0.181074	0.0865978	0.193908	0.140651	0.206998	0.1555	0.196801	0.156635
R160	# <--> PA	0	0	0	0	0	0	0	0	0	0
R161	# <--> CARB	0	0	0	0	0	0	0	0	0	0
R162	MAINT --> #	0	0	0	0	0	0	0	0	0	0

## Sheet: Sheet2
Fluxes (in mol. h-1. Mol B-1 ) at t=3.75 d
	Model	w/oEX*		Ex_CARB		Ex_G6P		Ex_PEP		Ex_GAP
Reaction Names	Reactions	Flux	SD	Flux	SD	Flux	SD	Flux	SD	Flux	SD
R1	10 Light + 3 ADP + 3 Pi + H + 2 cNADP --> O2 + H2O + 2 cNADPH + 3 ATP	4.72668	0.0369171	6.90221	0.0759806	9.09406	0.168273	19.3171	0.773972	17.7953	0.823767
R2	CO2 + H2O + cRu15DP --> 2 cG3P	4.72668	0.0369171	6.90221	0.0759806	9.09406	0.168273	19.3171	0.773972	17.7953	0.823767
R3	ATP + cG3P --> ADP + H + c13DPG	9.45336	0.0738342	13.8044	0.151961	18.1881	0.336547	38.6342	1.54794	35.5907	1.64753
R4	H + cNADPH + c13DPG <--> cNADP + Pi + cGAP	9.45336	0.0738342	13.8044	0.151961	18.1881	0.336547	38.6342	1.54794	35.5907	1.64753
R5	cGAP <--> cDHAP	1.57556	0.0123057	2.30074	0.0253269	3.03135	0.0560911	6.43903	0.257991	5.93178	0.274589
R6	cDHAP + cGAP <--> cF16P	1.57556	0.0123057	2.30074	0.0253269	3.03135	0.0560911	6.43903	0.257991	5.93178	0.274589
R7	H2O + cF16P <--> Pi + cF6P	1.57556	0.0123057	2.30074	0.0253269	3.03135	0.0560911	6.43903	0.257991	5.93178	0.274589
R8	cF6P + cGAP <--> cE4P + cX5P	1.57556	0.0123057	2.30074	0.0253269	3.03135	0.0560911	6.43903	0.257991	5.93178	0.274589
R9	H2O + cE4P + cGAP <--> Pi + cS7P	1.57556	0.0123057	2.30074	0.0253269	3.03135	0.0560911	6.43903	0.257991	5.93178	0.274589
R10	cGAP + cS7P <--> cR5P + cX5P	1.57556	0.0123057	2.30074	0.0253269	3.03135	0.0560911	6.43903	0.257991	5.93178	0.274589
R11	cX5P <--> cRu5P	3.15112	0.0246114	4.60148	0.0506537	6.06271	0.112182	12.8781	0.515981	11.8636	0.549178
R12	cR5P <--> cRu5P	1.57556	0.0123057	2.30074	0.0253269	3.03135	0.0560911	6.43903	0.257991	5.93178	0.274589
R13	ATP + cRu5P --> ADP + H + cRu15DP	4.72668	0.0369171	6.90221	0.0759806	9.09406	0.168273	19.3171	0.773972	17.7953	0.823767
R14	cGAP <--> GAP	1.57556	0.0123057	2.30074	0.0253269	3.03135	0.0560911	6.43903	0.257991	5.93178	0.274589
R15	G6P <--> G1P	0.29494	0.34335	0.543553	0.301117	0.457447	2.45105	0.408257	752.395	0.395344	33.6874
R16	F6P <--> G6P	0.295392	0.533058	0.545954	0.415669	0.921185	0.397827	0.419861	0.259426	0.411408	0.206884
R17	ATP + F6P --> ADP + F16P + H	0	0.0195716	0.00368088	0.0563597	0	0.0359005	0.190607	0.153412	0.250808	0.191931
R18	F16P + H2O --> F6P + Pi	0.295392	0.532698	0.549635	0.41183	0.921181	0.396204	0.610393	0.209204	0.66221	0.0772236
R19	DHAP + GAP <--> F16P	0.295392	0.533058	0.545954	0.415669	0.921181	0.397827	0.419785	0.259426	0.411402	0.206884
R20	DHAP <--> GAP	0.351195	0.552685	0.610221	0.419364	0.985988	0.398682	0.475722	0.260655	0.474941	0.209033
R21	GAP + NAD + Pi <--> 13DPG + H + NADH	0.928898	195.472	1.13963	1425.22	1.112	101.729	5.54355	2.27776	1.09492	15.3468
R22	13DPG + ADP <--> 3PG + ATP	0.928898	195.472	1.13963	1425.22	1.112	101.729	5.54355	2.27776	1.09492	15.3468
R23	3PG <--> 2PG	0.928898	195.472	1.13963	1425.22	1.112	101.729	5.54351	2.27776	1.09492	15.3468
R24	2PG <--> H2O + PEP	0.928898	195.472	1.13963	1425.22	1.112	101.729	5.54351	2.27776	1.09492	15.3468
R25	ADP + H + PEP <--> ATP + PYR	0.927124	2.42533	1.06773	0.92294	1.0767	0.433575	0.929443	0.420103	1.05565	0.496788
R26	CoA + NAD + PYR --> AcCoA + CO2 + NADH	0.927124	2.42533	1.06773	0.92294	1.0767	0.433575	0.929442	0.420103	1.05565	0.496788
R27	AcCoA + H2O + OXA <--> CIT + CoA + H	1.27375e-21	7.8195e-22	1.31828e-09	6.3046e-10	5.47675e-06	3.97256e-06	0.000104818	7.87403e-05	8.93271e-06	7.10959e-06
R28	CIT + NAD <--> AKG + CO2 + NADH	1.27375e-21	7.8195e-22	1.31828e-09	6.3046e-10	5.47675e-06	3.97256e-06	0.000104818	7.87403e-05	8.93271e-06	7.10959e-06
R29	AKG + CoA + NAD --> CO2 + NADH + SUCCoA	1.17981e-21	7.24284e-22	1.22106e-09	5.83966e-10	5.07286e-06	3.6796e-06	9.70876e-05	7.29335e-05	8.27396e-06	6.58529e-06
R30	ADP + Pi + SUCCoA <--> ATP + CoA + SUC	1.17981e-21	7.24284e-22	1.22106e-09	5.83966e-10	5.07286e-06	3.6796e-06	9.70876e-05	7.29335e-05	8.27396e-06	6.58529e-06
R31	FAD + SUC <--> FADH2 + FUM	1.18315e-21	7.26331e-22	1.22451e-09	5.85616e-10	5.0872e-06	3.69e-06	9.7362e-05	7.31396e-05	8.29734e-06	6.6039e-06
R32	FUM + H2O <--> MAL	1.2207e-21	7.49387e-22	1.26338e-09	6.04205e-10	5.24868e-06	3.80713e-06	0.000100453	7.54612e-05	8.56072e-06	6.81352e-06
R33	FAD + MAL <--> FADH2 + OXA	1.2207e-21	7.49387e-22	1.26338e-09	6.04205e-10	5.24868e-06	3.80713e-06	0.000100453	7.54612e-05	8.56072e-06	6.81352e-06
R34	ATP + CO2 + H2O + PYR --> ADP + OXA + Pi + 2 H	2.00065e-22	1.22819e-22	2.07059e-10	9.90251e-11	8.60223e-07	6.23962e-07	1.64635e-05	1.23676e-05	1.40304e-06	1.11669e-06
R35	ATP + OXA --> ADP + CO2 + PEP	0	0	0	0	0	0	0	0	0	0
R36	CO2 + H2O + PEP <--> H + OXA + Pi	0	0	0	0	0	0	0	0	0	0
R37	G6P + H2O + NADP <--> 6PG + NADPH + 2 H	1.42634e-21	8.75627e-22	1.4762e-09	7.05988e-10	6.13286e-06	4.44847e-06	0.000117375	8.81732e-05	1.00028e-05	7.96131e-06
R38	6PG + NADP <--> CO2 + NADPH + RU5P	1.42634e-21	8.75627e-22	1.4762e-09	7.05988e-10	6.13286e-06	4.44847e-06	0.000117375	8.81732e-05	1.00028e-05	7.96131e-06
R39	RU5P <--> R5P	5.00909e-22	3.07506e-22	5.18419e-10	2.47932e-10	2.15376e-06	1.56223e-06	4.12201e-05	3.09651e-05	3.51284e-06	2.79589e-06
R40	RU5P <--> X5P	9.25433e-22	5.6812e-22	9.57784e-10	4.58056e-10	3.9791e-06	2.88623e-06	7.61545e-05	5.72082e-05	6.49e-06	5.16542e-06
R41	R5P + X5P <--> GAP + S7P	4.76032e-22	2.92235e-22	4.92673e-10	2.35619e-10	2.0468e-06	1.48465e-06	3.9173e-05	2.94272e-05	3.33838e-06	2.65704e-06
R42	GAP + S7P <--> E4P + F6P	4.76032e-22	2.92235e-22	4.92673e-10	2.35619e-10	2.0468e-06	1.48465e-06	3.9173e-05	2.94272e-05	3.33838e-06	2.65704e-06
R43	F6P + GAP <--> E4P + X5P	4.49401e-22	2.75886e-22	4.65111e-10	2.22437e-10	1.93229e-06	1.40159e-06	3.69815e-05	2.77809e-05	3.15162e-06	2.50839e-06
R44	GLYC3P + NAD <--> DHAP + H + NADH	0.0558038	0.145981	0.0642667	0.055552	0.0648065	0.0260969	0.0559368	0.0252861	0.0635394	0.0299018
R45	H + NADH + NO3 <--> H2O + NAD + NO2	5.74617e-22	3.52756e-22	5.94704e-10	2.84415e-10	2.47069e-06	1.79211e-06	4.72856e-05	3.55215e-05	4.02975e-06	3.2073e-06
R46	5 H + 3 NADPH + NO2 <--> NH4 + 2 H2O + 3 NADP	5.74617e-22	3.52756e-22	5.94704e-10	2.84415e-10	2.47069e-06	1.79211e-06	4.72856e-05	3.55215e-05	4.02975e-06	3.2073e-06
R47	ATP + SO4 --> APS + PPi	1.33377e-23	8.18796e-24	1.38039e-11	6.60168e-12	5.73482e-08	4.15975e-08	1.09757e-06	8.24505e-07	9.35363e-08	7.4446e-08
R48	APS + NADH --> AMP + NAD + SO3	1.33377e-23	8.18796e-24	1.38039e-11	6.60168e-12	5.73482e-08	4.15975e-08	1.09757e-06	8.24505e-07	9.35363e-08	7.4446e-08
R49	5 H + 3 NADPH + SO3 <--> H2S + 3 H2O + 3 NADP	1.33377e-23	8.18796e-24	1.38039e-11	6.60168e-12	5.73482e-08	4.15975e-08	1.09757e-06	8.24505e-07	9.35363e-08	7.4446e-08
R50	1.5 ADP + 1.5 H + 1.5 Pi + FADH2 + 0.5 O2 --> FAD + 1.5 ATP + 2.5 H2O	2.40385e-21	1.47572e-21	2.48789e-09	1.18982e-09	1.03359e-05	7.49712e-06	0.000197815	0.000148601	1.68581e-05	1.34174e-05
R51	3.5 H + 2.5 ADP + 2.5 Pi + NADH + 0.5 O2 --> NAD + 2.5 ATP + 3.5 H2O	4.03267e-21	2.47565e-21	4.17365e-09	1.99603e-09	1.73393e-05	1.25771e-05	0.000331851	0.000249291	2.82809e-05	2.25089e-05
R52	H2O + PPi --> H + 2 Pi	1.06789e-22	6.55575e-23	1.10522e-10	5.28568e-11	4.59163e-07	3.33053e-07	8.78775e-06	6.60147e-06	7.48906e-07	5.96058e-07
R53	AMP + ATP --> 2 ADP	8.71336e-23	5.34911e-23	9.01796e-11	4.31281e-11	3.7465e-07	2.71752e-07	7.17028e-06	5.38641e-06	6.11063e-07	4.86348e-07
R54	ATP + H2O --> ADP + H + Pi + MAINT	0	0	0	0	0	0	0	0	0	0
R55	AKG + H + NADPH + NH4 --> GLU + H2O + NADP	9.6391e-22	5.91742e-22	9.97607e-10	4.77101e-10	4.14454e-06	3.00624e-06	7.93208e-05	5.95868e-05	6.75984e-06	5.38019e-06
R56	ATP + GLU + NH4 --> ADP + GLN + H + Pi	0	0	0	0	0	0	0	0	0	0
R57	AKG + GLN + H + NADPH <--> NADP + 2 GLU	9.60839e-23	5.89856e-23	9.94428e-11	4.75581e-11	4.13133e-07	2.99666e-07	7.90681e-06	5.93969e-06	6.7383e-07	5.36305e-07
R58	3PG + GLU + H2O + NAD <--> AKG + H + NADH + Pi + SER	4.45364e-22	2.73408e-22	4.60933e-10	2.2044e-10	1.91494e-06	1.389e-06	3.66493e-05	2.75314e-05	3.12331e-06	2.48586e-06
R59	SER --> NH4 + PYR	3.72753e-22	2.28832e-22	3.85784e-10	1.84499e-10	1.60273e-06	1.16254e-06	3.06741e-05	2.30428e-05	2.61409e-06	2.08057e-06
R60	AcCoA + H2S + SER <--> Ace + CYS + CoA + H	1.33377e-23	8.18796e-24	1.38039e-11	6.60168e-12	5.73482e-08	4.15975e-08	1.09757e-06	8.24505e-07	9.35363e-08	7.4446e-08
R61	ATP + Ace + CoA --> ADP + AcCoA + Pi	2.22002e-23	1.36286e-23	2.29763e-11	1.09883e-11	9.54545e-08	6.92379e-08	1.82687e-06	1.37237e-06	1.55689e-07	1.23913e-07
R62	GLU + PYR --> AKG + ALA	6.3705e-23	3.91083e-23	6.59319e-11	3.15317e-11	2.73913e-07	1.98683e-07	5.24232e-06	3.9381e-06	4.46759e-07	3.55578e-07
R63	H + THR <--> 2-oxobutan + NH4	1.36887e-23	8.40343e-24	1.41672e-11	6.7754e-12	5.88573e-08	4.26921e-08	1.12645e-06	8.46203e-07	9.59978e-08	7.64051e-08
R64	2-oxobutan + GLU + H + NADPH + PYR <--> AKG + CO2 + H2O + ILE + NADP	1.36887e-23	8.40343e-24	1.41672e-11	6.7754e-12	5.88573e-08	4.26921e-08	1.12645e-06	8.46203e-07	9.59978e-08	7.64051e-08
R65	2 H + ALA + NADPH + PYR <--> CO2 + H2O + NADP + VAL	2.25951e-23	1.3871e-23	2.3385e-11	1.11838e-11	9.71523e-08	7.04694e-08	1.85936e-06	1.39678e-06	1.58458e-07	1.26117e-07
R66	2 PYR + AcCoA + GLU + H + NAD + NADPH <--> AKG + CoA + LEU + NADH + NADP + 2 CO2	3.33442e-23	2.04699e-23	3.45098e-11	1.65042e-11	1.4337e-07	1.03994e-07	2.74391e-06	2.06126e-06	2.33841e-07	1.86115e-07
R67	2 PEP + ATP + E4P + NADPH --> ADP + CHO + NADP + 4 Pi	2.66754e-23	1.63759e-23	2.76079e-11	1.32034e-11	1.14696e-07	8.31949e-08	2.19513e-06	1.64901e-06	1.87073e-07	1.48892e-07
R68	CHO <--> PRE	2.62805e-23	1.61335e-23	2.71992e-11	1.30079e-11	1.12999e-07	8.19634e-08	2.16264e-06	1.6246e-06	1.84303e-07	1.46688e-07
R69	GLU + H + PRE <--> AKG + CO2 + H2O + PHE	1.51804e-23	9.31919e-24	1.57111e-11	7.51375e-12	6.52713e-08	4.73445e-08	1.2492e-06	9.38417e-07	1.06459e-07	8.47313e-08
R70	GLU + NAD + PRE <--> AKG + CO2 + NADH + TYR	1.11001e-23	6.81432e-24	1.14881e-11	5.49416e-12	4.77273e-08	3.46189e-08	9.13435e-07	6.86184e-07	7.78443e-08	6.19567e-08
R71	CHO + GLN <--> ANTH + GLU + H + PYR	3.50992e-25	2.15473e-25	3.63261e-13	1.73728e-13	1.50916e-09	1.09467e-09	2.88833e-08	2.16975e-08	2.46148e-09	1.9591e-09
R72	ANTH + H + PRPP + SER <--> CO2 + GAP + PPi + TRYP + 2 H2O	3.50992e-25	2.15473e-25	3.63261e-13	1.73728e-13	1.50916e-09	1.09467e-09	2.88833e-08	2.16975e-08	2.46148e-09	1.9591e-09
R73	3 H2O + 2 NAD + ATP + GLN + PRPP --> AICAR + AKG + HIS + Pi + 2 NADH + 2 PPi + 5 H	6.27397e-24	3.85157e-24	6.4933e-12	3.10539e-12	2.69763e-08	1.95672e-08	5.16289e-07	3.87843e-07	4.3999e-08	3.5019e-08
R74	GLU + OXA <--> AKG + ASP	1.47065e-22	9.0283e-23	1.52207e-10	7.27922e-11	6.32339e-07	4.58667e-07	1.21021e-05	9.09126e-06	1.03136e-06	8.20865e-07
R75	ASP + ATP + GLN + H2O --> ADP + ASN + GLU + H + Pi	1.7418e-23	1.06928e-23	1.80268e-11	8.62127e-12	7.48922e-08	5.4323e-08	1.43333e-06	1.07674e-06	1.22151e-07	9.72206e-08
R76	2 ATP + 2 H2O + CO2 + GLN --> CaP + GLU + Pi + 2 ADP + 3 H	2.83426e-23	1.73994e-23	2.93334e-11	1.40286e-11	1.21865e-07	8.83946e-08	2.33233e-06	1.75207e-06	1.98765e-07	1.58198e-07
R77	2 GLU + ASP + ATP + CaP + NADH --> AKG + AMP + ARG + FUM + H2O + NAD + PPi + Pi	1.92607e-23	1.18241e-23	1.9934e-11	9.53334e-12	8.28153e-08	6.007e-08	1.58497e-06	1.19065e-06	1.35074e-07	1.07506e-07
R78	3 H + 2 NADH + GLU <--> PRO + 2 H2O + 2 NAD	2.40868e-23	1.47868e-23	2.49288e-11	1.19221e-11	1.03566e-07	7.51217e-08	1.98212e-06	1.48899e-06	1.68919e-07	1.34444e-07
R79	AKG + O2 + PRO <--> CO2 + HydPro + SUC	3.33442e-24	2.04699e-24	3.45098e-12	1.65042e-12	1.4337e-08	1.03994e-08	2.74391e-07	2.06126e-07	2.33841e-08	1.86115e-08
R80	ASP + ATP + H + NADPH --> ADP + ASA + NADP + Pi	6.55477e-23	4.02395e-23	6.78391e-11	3.24438e-11	2.81836e-07	2.0443e-07	5.39396e-06	4.05201e-06	4.59682e-07	3.65863e-07
R81	2 H + ASA + GLU + NADH + PYR <--> AKG + DAP + H2O + NAD	2.22002e-23	1.36286e-23	2.29763e-11	1.09883e-11	9.54545e-08	6.92379e-08	1.82687e-06	1.37237e-06	1.55689e-07	1.23913e-07
R82	DAP <--> CO2 + H + LYS	2.22002e-23	1.36286e-23	2.29763e-11	1.09883e-11	9.54545e-08	6.92379e-08	1.82687e-06	1.37237e-06	1.55689e-07	1.23913e-07
R83	ASA + H + NADPH <--> HSER + NADP	4.33475e-23	2.66109e-23	4.48628e-11	2.14554e-11	1.86382e-07	1.35192e-07	3.56709e-06	2.67964e-06	3.03993e-07	2.41949e-07
R84	ATP + H2O + HSER --> ADP + H + Pi + THR	3.4441e-23	2.11432e-23	3.5645e-11	1.70471e-11	1.48087e-07	1.07415e-07	2.83417e-06	2.12907e-06	2.41533e-07	1.92237e-07
R85	AcCoA + CYS + H2O + HSER <--> Ace + CoA + HCYS + H + NH4 + PYR	8.90641e-24	5.46762e-24	9.21776e-12	4.40836e-12	3.8295e-08	2.77773e-08	7.32914e-07	5.50574e-07	6.24601e-08	4.97123e-08
R86	HCYS + MTHF <--> H + MET + THF	1.00033e-23	6.14097e-24	1.0353e-11	4.95126e-12	4.30111e-08	3.11981e-08	8.23174e-07	6.18379e-07	7.01522e-08	5.58345e-08
R87	4.306 ATP + 3.306 H2O + 0.111 ALA + 0.092 GLY + 0.09 LEU + 0.061 VAL + 0.06 LYS + 0.056 PRO + 0.056 THR + 0.054 SER + 0.052 ARG + 0.052 GLN + 0.052 GLU + 0.047 ASN + 0.047 ASP + 0.041 PHE + 0.037 ILE + 0.03 TYR + 0.024 MET + 0.017 HIS + 0.012 CYS + 0.0090 HydPro + 0.0010 TRYP --> PROTEIN + 4.306 ADP + 4.306 Pi + 4.319 H	3.7034e-22	2.27351e-22	3.83286e-10	1.83305e-10	1.59235e-06	1.15501e-06	3.04755e-05	2.28936e-05	2.59717e-06	2.0671e-06
R88	GLY + H + PYR <--> ALA + glyoxylate	0	0	0	0	0	0	0	0	0	0
R89	SER + glyoxylate <--> GLY + HydPyr	0	0	0	0	0	0	0	0	0	0
R90	GLY + H2O + METHF <--> SER + THF	3.88723e-23	2.38636e-23	4.02312e-11	1.92404e-11	1.6714e-07	1.21235e-07	3.19883e-06	2.403e-06	2.72609e-07	2.16971e-07
R91	GLY + NAD + THF <--> CO2 + METHF + NADH + NH4	4.29965e-24	2.63954e-24	4.44995e-12	2.12817e-12	1.84872e-08	1.34097e-08	3.53821e-07	2.65794e-07	3.01531e-08	2.3999e-08
R92	H + HydPyr + NADH <--> Glycerate + NAD	0	0	0	0	0	0	0	0	0	0
R93	ATP + Glycerate --> ADP + 2 H + 3PG	0	0	0	0	0	0	0	0	0	0
R94	ATP + R5P --> AMP + H + PRPP	2.48765e-23	1.52716e-23	2.57462e-11	1.2313e-11	1.06962e-07	7.75848e-08	2.0471e-06	1.53781e-06	1.74457e-07	1.38852e-07
R95	5FTHF + H <--> H2O + MYLTHF	0	0	0	0	0	0	0	0	0	0
R96	H2O + MYLTHF <--> H + N10FTHF	2.44817e-23	1.50292e-23	2.53375e-11	1.21176e-11	1.05264e-07	7.63532e-08	2.01461e-06	1.5134e-06	1.71688e-07	1.36648e-07
R97	ATP + FORM + THF --> ADP + N10FTHF + Pi	0	0	0	0	0	0	0	0	0	0
R98	MYLTHF + NADPH <--> METHF + NADP	2.44817e-23	1.50292e-23	2.53375e-11	1.21176e-11	1.05264e-07	7.63532e-08	2.01461e-06	1.5134e-06	1.71688e-07	1.36648e-07
R99	H + METHF + NADPH <--> MTHF + NADP	1.00033e-23	6.14097e-24	1.0353e-11	4.95126e-12	4.30111e-08	3.11981e-08	8.23174e-07	6.18379e-07	7.01522e-08	5.58345e-08
R100	5FTHF + ATP + H2O --> ADP + H + N10FTHF + Pi	0	0	0	0	0	0	0	0	0	0
R101	FORM + H + THF <--> H2O + N10FTHF	0	0	0	0	0	0	0	0	0	0
R102	DHF + H + NADPH <--> NADP + THF	1.31622e-25	8.08022e-26	1.36223e-13	6.51481e-14	5.65936e-10	4.10501e-10	1.08312e-08	8.13657e-09	9.23055e-10	7.34664e-10
R103	ACP + AcCoA + H <--> AcACP + CoA	0.111608	0.291963	0.128533	0.111104	0.129613	0.0521939	0.111874	0.0505722	0.127079	0.0598036
R104	ATP + AcCoA + CO2 + H2O <--> ADP + H + MalCoA + Pi	0.815516	2.13337	0.939194	0.811836	0.947083	0.381381	0.81746	0.369531	0.928564	0.436985
R105	ACP + MalCoA <--> CoA + MalACP	0.815516	2.13337	0.939194	0.811836	0.947083	0.381381	0.81746	0.369531	0.928564	0.436985
R106	12 H + 12 NADPH + 6 MalACP + AcACP <--> C14:0ACP + 6 ACP + 6 CO2 + 6 H2O + 12 NADP	0.0303573	0.0794138	0.0349611	0.0302203	0.0352548	0.0141967	0.0304296	0.0137556	0.0345654	0.0162666
R107	C14:0ACP + H + NADH + O2 <--> C14:1ACP + NAD + 2 H2O	0.00111608	0.00291963	0.00128533	0.00111104	0.00129613	0.000521939	0.00111874	0.000505722	0.00127079	0.000598036
R108	14 H + 14 NADPH + 7 MalACP + AcACP <--> C16:0ACP + 7 ACP + 7 CO2 + 7 H2O + 14 NADP	0.0186385	0.0487577	0.0214651	0.0185544	0.0216454	0.00871638	0.0186829	0.00844555	0.0212222	0.0099872
R109	C16:0ACP + H + NADH + O2 <--> C16:1ACP + NAD + 2 H2O	0.00625002	0.0163499	0.00719787	0.00622182	0.00725833	0.00292286	0.00626492	0.00283204	0.00711641	0.003349
R110	C16:1ACP + H + NADH + O2 <--> C16:2ACP + NAD + 2 H2O	0.00089286	0.0023357	0.00102827	0.000888831	0.0010369	0.000417551	0.000894989	0.000404577	0.00101663	0.000478429
R111	C16:2ACP + H + NADH + O2 <--> C16:3ACP + NAD + 2 H2O	0.00089286	0.0023357	0.00102827	0.000888831	0.0010369	0.000417551	0.000894989	0.000404577	0.00101663	0.000478429
R112	16 H + 16 NADPH + 8 MalACP + AcACP <--> C18:0ACP + 8 ACP + 8 CO2 + 8 H2O + 16 NADP	0.0606029	0.158536	0.0697937	0.0603294	0.0703799	0.0283413	0.0607474	0.0274607	0.0690038	0.0324733
R113	C18:0ACP + H + NADH + O2 <--> C18:1ACP + NAD + 2 H2O	0.0599333	0.156784	0.0690225	0.0596628	0.0696022	0.0280281	0.0600761	0.0271573	0.0682413	0.0321145
R114	C18:1ACP + H + NADH + O2 <--> C18:2ACP + NAD + 2 H2O	0.0195313	0.0510934	0.0224934	0.0194432	0.0226823	0.00913393	0.0195779	0.00885013	0.0222388	0.0104656
R115	C18:2ACP + H + NADH + O2 <--> C18:3ACP + NAD + 2 H2O	0.0136161	0.0356194	0.0156811	0.0135547	0.0158128	0.00636766	0.0136486	0.0061698	0.0155036	0.00729604
R116	C18:3ACP + H + NADH + O2 <--> C18:4ACP + NAD + 2 H2O	0.00792414	0.0207293	0.00912587	0.00788838	0.00920253	0.00370577	0.00794303	0.00359062	0.00902259	0.00424605
R117	18 H + 18 NADPH + 9 MalACP + AcACP <--> C20:0ACP + 9 ACP + 9 CO2 + 9 H2O + 18 NADP	0.00200894	0.00525533	0.0023136	0.00199987	0.00233304	0.00093949	0.00201373	0.000910299	0.00228742	0.00107646
R118	C20:0ACP + H + NADH + O2 <--> C20:1ACP + NAD + 2 H2O	0.00200894	0.00525533	0.0023136	0.00199987	0.00233304	0.00093949	0.00201373	0.000910299	0.00228742	0.00107646
R119	C20:1ACP + H + NADH + O2 <--> C20:2ACP + NAD + 2 H2O	0.00200894	0.00525533	0.0023136	0.00199987	0.00233304	0.00093949	0.00201373	0.000910299	0.00228742	0.00107646
R120	C20:2ACP + H + NADH + O2 <--> C20:3ACP + NAD + 2 H2O	0.00200894	0.00525533	0.0023136	0.00199987	0.00233304	0.00093949	0.00201373	0.000910299	0.00228742	0.00107646
R121	C20:3ACP + H + NADH + O2 <--> C20:4ACP + NAD + 2 H2O	0.00200894	0.00525533	0.0023136	0.00199987	0.00233304	0.00093949	0.00201373	0.000910299	0.00228742	0.00107646
R122	C20:4ACP + H + NADH + O2 <--> C20:5ACP + NAD + 2 H2O	0.00200894	0.00525533	0.0023136	0.00199987	0.00233304	0.00093949	0.00201373	0.000910299	0.00228742	0.00107646
R123	GLYC3P + 0.524 C14:0ACP + 0.02 C14:1ACP + 0.222 C16:0ACP + 0.096 C16:1ACP + 0.016 C16:3ACP + 0.012 C18:0ACP + 0.724 C18:1ACP + 0.106 C18:2ACP + 0.102 C18:3ACP + 0.142 C18:4ACP + 0.036 C20:5ACP <--> PA + 2 ACP + 2 H	0.0558038	0.145981	0.0642667	0.055552	0.0648065	0.0260969	0.0559368	0.0252861	0.0635394	0.0299018
R124	4 ATP + 2 GLN + 2 H2O + ASP + CO2 + GLY + N10FTHF + PRPP --> AICAR + FUM + PPi + THF + 2 GLU + 4 ADP + 4 Pi + 7 H	9.12578e-24	5.60229e-24	9.4448e-12	4.51694e-12	3.92382e-08	2.84614e-08	7.50966e-07	5.64135e-07	6.39985e-08	5.09367e-08
R125	ASP + CaP + H + O2 + PRPP <--> CO2 + H2O + H2O2 + PPi + Pi + UMP	9.12578e-24	5.60229e-24	9.4448e-12	4.51694e-12	3.92382e-08	2.84614e-08	7.50966e-07	5.64135e-07	6.39985e-08	5.09367e-08
R126	2 H2O2 <--> O2 + 2 H2O	4.56289e-24	2.80114e-24	4.7224e-12	2.25847e-12	1.96191e-08	1.42307e-08	3.75483e-07	2.82068e-07	3.19993e-08	2.54684e-08
R127	ATP + UMP --> ADP + UDP	9.12578e-24	5.60229e-24	9.4448e-12	4.51694e-12	3.92382e-08	2.84614e-08	7.50966e-07	5.64135e-07	6.39985e-08	5.09367e-08
R128	ATP + UDP <--> ADP + UTP	8.99416e-24	5.52149e-24	9.30857e-12	4.45179e-12	3.86723e-08	2.80509e-08	7.40135e-07	5.55999e-07	6.30755e-08	5.02021e-08
R129	ATP + GLN + H2O + UTP --> ADP + CTP + GLU + Pi + 2 H	6.18623e-24	3.7977e-24	6.40248e-12	3.06196e-12	2.6599e-08	1.92936e-08	5.09068e-07	3.82419e-07	4.33836e-08	3.45292e-08
R130	ATP + CDP <--> ADP + CTP	1.75496e-25	1.07736e-25	1.81631e-13	8.68642e-14	7.54581e-10	5.47335e-10	1.44417e-08	1.08488e-08	1.23074e-09	9.79552e-10
R131	AICAR + N10FTHF <--> H2O + IMP + THF	1.53998e-23	9.45386e-24	1.59381e-11	7.62233e-12	6.62145e-08	4.80287e-08	1.26726e-06	9.51978e-07	1.07997e-07	8.59557e-08
R132	ATP + H2O + IMP + NAD + NH4 --> AMP + GMP + NADH + PPi + 3 H	6.18623e-24	3.7977e-24	6.40248e-12	3.06196e-12	2.6599e-08	1.92936e-08	5.09068e-07	3.82419e-07	4.33836e-08	3.45292e-08
R133	ATP + GMP --> ADP + GDP	6.18623e-24	3.7977e-24	6.40248e-12	3.06196e-12	2.6599e-08	1.92936e-08	5.09068e-07	3.82419e-07	4.33836e-08	3.45292e-08
R134	ATP + GDP <--> ADP + GTP	1.52243e-23	9.34612e-24	1.57565e-11	7.53547e-12	6.54599e-08	4.74813e-08	1.25281e-06	9.41129e-07	1.06767e-07	8.49762e-08
R135	ASP + GTP + IMP <--> AMP + FUM + GDP + Pi + 2 H	9.21353e-24	5.65616e-24	9.53561e-12	4.56037e-12	3.96155e-08	2.87351e-08	7.58187e-07	5.6956e-07	6.46139e-08	5.14265e-08
R136	ATP + H + METHF + NADPH + UDP --> ADP + DHF + H2O + NADP + dTTP	1.31622e-25	8.08022e-26	1.36223e-13	6.51481e-14	5.65936e-10	4.10501e-10	1.08312e-08	8.13657e-09	9.23055e-10	7.34664e-10
R137	ATP + CDP + H + NADPH --> ADP + H2O + NADP + dCTP	1.75496e-25	1.07736e-25	1.81631e-13	8.68642e-14	7.54581e-10	5.47335e-10	1.44417e-08	1.08488e-08	1.23074e-09	9.79552e-10
R138	ATP + GDP + H + NADPH --> ADP + H2O + NADP + dGTP	1.75496e-25	1.07736e-25	1.81631e-13	8.68642e-14	7.54581e-10	5.47335e-10	1.44417e-08	1.08488e-08	1.23074e-09	9.79552e-10
R139	ATP + H + NADPH <--> H2O + NADP + dATP	1.31622e-25	8.08022e-26	1.36223e-13	6.51481e-14	5.65936e-10	4.10501e-10	1.08312e-08	8.13657e-09	9.23055e-10	7.34664e-10
R140	2.372 H2O + 1.372 ATP + 0.18 dATP + 0.18 dTTP + 0.32 dCTP + 0.32 dGTP --> DNA + PPi + 1.372 ADP + 1.372 Pi + 2.372 H	6.14235e-25	3.77077e-25	6.35707e-13	3.04025e-13	2.64103e-09	1.91567e-09	5.05458e-08	3.79706e-08	4.30759e-09	3.42843e-09
R141	1.4 H2O + 0.56 ATP + 0.34 GTP + 0.16 UTP + 0.34 CTP --> 0.4 ADP + 0.4 H + 0.4 Pi + PPi + RNA	1.75934e-23	1.08006e-23	1.82085e-11	8.70813e-12	7.56468e-08	5.48703e-08	1.44778e-06	1.08759e-06	1.23382e-07	9.82001e-08
R142	12 H + 8 ATP + 8 GLU + 8 NADPH + 2.5 O2 --> PPorphyrin + 4 NH4 + 6 CO2 + 8 AMP + 8 NADP + 8 PPi + 13 H2O	1.09685e-24	6.73352e-25	1.13519e-12	5.42901e-13	4.71613e-09	3.42084e-09	9.02603e-08	6.78047e-08	7.69213e-09	6.1222e-09
R143	18 H + 15 NADPH + 8 ATP + 4 GAP + 4 PYR --> Phytyl-PP + 4 ADP + 4 AMP + 4 CO2 + 7 PPi + 8 H2O + 15 NADP	1.09685e-24	6.73352e-25	1.13519e-12	5.42901e-13	4.71613e-09	3.42084e-09	9.02603e-08	6.78047e-08	7.69213e-09	6.1222e-09
R144	ATP + H2O + MET --> AdMET + H + PPi + Pi	1.09685e-24	6.73352e-25	1.13519e-12	5.42901e-13	4.71613e-09	3.42084e-09	9.02603e-08	6.78047e-08	7.69213e-09	6.1222e-09
R145	AdHCYS + H2O <--> Ad + HCYS	1.09685e-24	6.73352e-25	1.13519e-12	5.42901e-13	4.71613e-09	3.42084e-09	9.02603e-08	6.78047e-08	7.69213e-09	6.1222e-09
R146	ATP + Ad --> ADP + AMP + H	1.09685e-24	6.73352e-25	1.13519e-12	5.42901e-13	4.71613e-09	3.42084e-09	9.02603e-08	6.78047e-08	7.69213e-09	6.1222e-09
R147	4 NADPH + 2.5 O2 + 2 ATP + AdMET + Mg2 + PPorphyrin + Phytyl-PP --> AdHCYS + Chlorophyll + PPi + 2 ADP + 2 H2O + 2 Pi + 3 H + 4 NADP	1.09685e-24	6.73352e-25	1.13519e-12	5.42901e-13	4.71613e-09	3.42084e-09	9.02603e-08	6.78047e-08	7.69213e-09	6.1222e-09
R148	G1P <--> CARB + Pi	0.29494	0.34335	0.543553	0.301117	0.457447	2.45105	0.408257	752.395	0.395344	33.6874
R149	32.687 ATP + 32.687 H2O + 0.8456 PROTEIN + 0.0026 Chlorophyll + 0.0402 RNA + 0.0014 DNA + 0.1103 PA --> Biomass + 32.687 H + 32.687 ADP + 32.687 Pi	4.38739e-22	2.69341e-22	4.54077e-10	2.1716e-10	1.88645e-06	1.36834e-06	3.61041e-05	2.71219e-05	3.07685e-06	2.44888e-06
R150	# <--> CO2	3.79956	2.42561	5.83449	0.926062	8.01734	0.465084	18.3873	0.880635	16.7397	0.961972
R151	# <--> O2	4.60648	0.316603	6.76378	0.141744	8.95445	0.177414	19.1963	0.775886	17.6585	0.826281
R152	# <--> H2O	2.27721	195.474	3.73462	1425.22	5.59269	101.73	7.70375	2.34735	11.1571	15.3574
R153	# <--> Pi	1.09861	195.485	1.40798	1425.22	1.81763	101.76	10.1463	752.399	5.04057	37.0222
R154	# <--> SO4	1.33377e-23	8.18796e-24	1.38039e-11	6.60168e-12	5.73482e-08	4.15975e-08	1.09757e-06	8.24505e-07	9.35363e-08	7.4446e-08
R155	# <--> NO3	5.74617e-22	3.52756e-22	5.94704e-10	2.84415e-10	2.47069e-06	1.79211e-06	4.72856e-05	3.55215e-05	4.02975e-06	3.2073e-06
R156	# <--> Mg2	1.09685e-24	6.73352e-25	1.13519e-12	5.42901e-13	4.71613e-09	3.42084e-09	9.02603e-08	6.78047e-08	7.69213e-09	6.1222e-09
R157	# --> Light	47.2668	0.369171	69.0221	0.759806	90.9406	1.68273	193.171	7.73972	177.953	8.23767
R158	# <--> H	0.989747	195.537	1.06631	1425.22	1.11619	101.733	3.81074	2.44286	0.838895	15.3824
R159	Biomass --> #	4.38739e-22	2.69341e-22	4.54077e-10	2.1716e-10	1.88645e-06	1.36834e-06	3.61041e-05	2.71219e-05	3.07685e-06	2.44888e-06
R160	# <--> PA	0	0	0	0	0	0	0	0	0	0
R161	# <--> CARB	0	0	0	0	0	0	0	0	0	0
R162	MAINT --> #	0	0	0	0	0	0	0	0	0	0
